Title: PHARMACOKINETICS OF FENTANYL FOR INFANTS AND ADULTS

Authors: MA Singleton MD, JI Rosen BA, DM Fisher MD

Affiliation: Department of Anesthesia, University of California, San Francisco, California 94143

**Introduction.** Despite the frequent use of narcotics for analgesia and anesthesia in infants and children, these drugs have undergone minimal investigation in pediatric patients. Our clinical experience suggests that infants and children tolerate large doses of fentanyl without the prolonged respiratory depression seen in adults. To explore the possibility of age-related differences in either distribution or elimination, we determined the pharmacokinetics of fentanyl in infants and adults.

**Methods.** We obtained approval from the local committee on human research and informed consent to study seven infants (3-10 months) and five adults (18-41 years), all ASA I and II. Patients were scheduled for elective noncardiac surgery and received no premedication. Anesthesia was induced with thiopental (2-6 mg/kg), N<sub>2</sub>O, and oxygen, followed by pancuronium (0.1 mg/kg). Ventilation was controlled to keep P<sub>a</sub>CO<sub>2</sub> at 35-42 mmHg; nasopharyngeal temperature was maintained at 35-37°C. Fentanyl (30 ug/kg for infants, 20 ug/kg for adults) was then given as a constant 2-min iv infusion. Anesthesia was maintained with N<sub>2</sub>O, morphine sulfate, and pancuronium. Blood samples were obtained from an arterial or central venous catheter at frequent intervals for 4 h after the start of the fentanyl infusion. Plasma was stored at -20°C until concentrations of fentanyl were determined using radioimmunoassay (sensitivity, 0.5 ng/ml; coefficient of variation, <5%). The concentration-time curve was fitted, using a least-squares, nonlinear regression, to a two-compartment pharmacokinetic model adjusted for the infusion. Using standard formulas, we determined: distribution half-life (t<sub>1/2α</sub>), elimination half-life (t<sub>1/2β</sub>), volume of the central compartment (V<sub>1</sub>), steady-state volume of distribution (Vd<sub>SS</sub>), and total plasma clearance (Cl). Mean values for these variables were compared for the two groups using Student's *t* test for unpaired data; P < 0.05 was considered significant.

**Results.** Elimination half-life was shorter and clearance higher in infants than in adults (table). There were no significant differences for V<sub>1</sub>, Vd<sub>SS</sub>, or t<sub>1/2α</sub>. Three to 4 h after administration, plasma concentrations of fentanyl increased transiently in two infants and two adults.

**Discussion.** The combination of a similar Vd<sub>SS</sub> and a higher clearance results in a shorter elimination half-life in infants. As a result, at 3 h, plasma levels of fentanyl were lower in infants despite administration of a larger dose. Since fentanyl is lipophilic, its Vd<sub>SS</sub> will depend on body composition, particularly adiposity. Body fat represents about 25% of body weight in infants,<sup>1</sup> similar to the value for adults, which may account for the similarity of Vd<sub>SS</sub> in infants and adults.

Since Vd<sub>SS</sub> is similar for these two groups, fentanyl levels after distribution are similar in infants and adults. We found that the clearance of fentanyl was higher in infants than in adults. This is not surprising since fentanyl is metabolized by "mixed-function" oxidase enzymes<sup>2</sup> (found primarily in the liver) which have greater activity in infants than in adults.<sup>3</sup> Also, the liver comprises 5% of the mass of an infant compared to 2% of the mass of the adult. The secondary increases we observed in infants are consistent with previous reports for adults,<sup>4</sup> and could explain the biphasic respiratory depression reported for fentanyl.<sup>5</sup> Since recovery from large doses of fentanyl depends on elimination, rather than distribution, the shorter elimination half-life in infants may account for less postoperative depression.

#### References.

1. Friis-Hansen B: Body composition during growth. In *vivo* measurements and biochemical data correlated to differential anatomical growth. *Pediatrics* 47:264-274, 1971
2. Goromaru T, Furuta T, Baba S, *et al.*: Metabolism of fentanyl in rats and man. *Anesthesiology* 55:A173, 1981
3. Klinger W: Development of drug metabolizing enzymes, *Drug Disposition During Development*. Edited by Morselli PL. New York, Spectrum, 1977, pp 71-88
4. Stoeckel H, Hengstmann JH, Schüttler J: Pharmacokinetics of fentanyl as a possible explanation for recurrence of respiratory depression. *Br J Anaesth* 51:741-744, 1979
5. Becker LD, Paulson BA, Miller RD, *et al.*: Biphasic respiratory depression after fentanyl-droperidol or fentanyl alone used to supplement nitrous oxide anesthesia. *Anesthesiology* 44:291-296, 1976

Table. Pharmacokinetic data for fentanyl (mean ± SD)

|                                              | Infants      | Adults       |
|----------------------------------------------|--------------|--------------|
| n                                            | 7            | 5            |
| t <sub>1/2α</sub> (min)                      | 1.1 ± 0.4    | 2.1 ± 1.6    |
| t <sub>1/2β</sub> (min)                      | 68.0 ± 19.9* | 120.9 ± 39.7 |
| V <sub>1</sub> (l/kg)                        | 0.24 ± 0.11  | 0.24 ± 0.16  |
| Vd <sub>SS</sub> (l/kg)                      | 2.30 ± 0.58  | 2.40 ± 0.63  |
| Cl (ml·kg <sup>-1</sup> ·min <sup>-1</sup> ) | 30.6 ± 5.3*  | 17.9 ± 2.8   |
| Dose (ug/kg)                                 | 31.5 ± 1.5*  | 20.8 ± 1.5   |
| Plasma conc. at 180 min (ng/ml)              | 1.84 ± 0.61  | 2.24 ± 0.66  |

\*Different from adults, P < 0.05.
